# Supplementary material for: Ribosome demand links transcriptional bursts to protein expression noise
Source: eLife. 2026 Feb 18;13:RP99322. doi: 10.7554/eLife.99322 (PMC12916104; doi:10.7554/eLife.99322)
Supplement: Supplementary file 1. [file elife-99322-supp1.docx]

Supplementary File 1

List of mathematical functions explored to model ribosome demand

mRNAprev - Number of mRNA molecules at the previous time-point during simulation

mRNAcurr - Number of mRNA molecules present at the present time-point during simulation

riboprev  -Number of ribosomes that were bound to mRNA molecules at the previous time-point during simulation

ribocurr - Number of ribosomes that are bound to mRNA molecules at the current time-point during simulation

tlinitrbase – The basal translation initiation rate

tlinitrcurr - the translation initiation rate at the current time-point during simulation

| **Function number (FN)** | **Function** |
| --- | --- |
| 1 | | av= | | --- | | kc= 1 + | | × | |  | |
| 2 | | av= | | --- | | kc= 1 + | | × | |  | |
| 3 | | av= | | --- | | kc= 1 + | | × | |  | |
| 4 | | av= | | --- | | kc= [1 + ] × | | × | |  | |
| 5 | | av= | | --- | | kc= 1 + | | × | |  | |
| 6 | | av= | | --- | | kc= 1 + | | × | |  | |
| 7 | | av= | | --- | | kc= 1 + | | × | |  | |
| 8 | | av= | | --- | | kc= 1 + | | × | |  | |
| 9 | | av= | | --- | | kc= 1 + | | × | |  | |
| 10 | | av= | | --- | | kc= 1 + | | × | |  | |
| 11 | | av= | | --- | | × | |  | |
| 12 | | av= | | --- | | × | |  | |  | |
| 13 | | av= | | --- | | × | |  | |
| 14 | | av= | | --- | | kc= 1 + | | × | |  | |
| 15 | | av= | | --- | | kc= 1 + | | × | |  | |
| 16 | | av= | | --- | | kc= 1 + | | × | |  | |
| 17 | | av= | | --- | | kc= 1 + | | × | |  | |
| 18 | | av= | | --- | | kc= 1 + | | × | |  | |
| 19 | | av= | | --- | | kc= 1 + | | × | |  | |
